# Supplementary material for: An empirically derived recommendation for the classification of body dysmorphic disorder: Findings from structural equation modeling
Source: PLOS journal article supplement (doi:10.1371/journal.pone.0233153), 2020-06-03
Supplement: S1 (10.1371/journal.pone.0233153.s001) [file journal.pone.0233153.s001.pdf]

An empirically derived recommendation for the classification of  
body dysmorphic disorder: Findings from structural equation modeling

| SPSS Variable                     | Content                                                                                                                                                                                                                                                                 |
|-----------------------------------|-------------------------------------------------------------------------------------------------------------------------------------------------------------------------------------------------------------------------------------------------------------------------|
| gender                            | Gender: 1=male, 2=female                                                                                                                                                                                                                                                |
| age                               | Age in years                                                                                                                                                                                                                                                            |
| sexori                            | Sexual orientation: 1= gay, 2 = lesbian, 3 = heterosexual, 4 = bisexual, 5 = pansexual, 6 = polysexual, 7 = asexual, 8 = other                                                                                                                                          |
| educ                              | Educational attainment, 1 = without formal educational degree, 2 = vocational education, 3 = high school degree, 4 = university of applied science entrance diploma, 5 = university-entrance diploma, 6 = university of applied science diploma, 7 = university diploma |
| mentdis                           | Diagnosis of a mental disorder: 1 = yes, 0 = no                                                                                                                                                                                                                         |
| fks1, fks16 .. fks30              | 16 Items „Fragebogen Körperdysmorpher Symptome“ (Body Dysmorphic Symptoms Inventory); range: 0 .. 4                                                                                                                                                                     |
| fks                               | Mean(fks1, fks16 .. fks30)                                                                                                                                                                                                                                              |
| fkscut                            | Cutoff: fkscut = 1 if (fks15 < 3), fkscut = 0 else                                                                                                                                                                                                                      |
| edeq1 .. edeq12, edeq19 .. edeq28 | 22 Items “Eating Disorder Examination-Questionnaire”; range 0 .. 6                                                                                                                                                                                                      |
| edeq                              | Mean(edeq1 .. edeq12, edeq19 .. edeq28)                                                                                                                                                                                                                                 |
| phq1 .. phq9                      | 9 Items „Patient Health Questionnaire”; range: 0 .. 3                                                                                                                                                                                                                   |
| phq                               | Mean(phq1 .. phq9)                                                                                                                                                                                                                                                      |
| oci1 .. oci18                     | 18 Items „Obsessive-Compulsive Inventory-Revised”; range: 0 .. 4                                                                                                                                                                                                        |
| oci                               | Mean(oci1 .. oci18)                                                                                                                                                                                                                                                     |
| hai1 .. hai14                     | 14 Items “Short Health Anxiety Inventory”; range: 1 .. 5                                                                                                                                                                                                                |
| hai                               | Mean(hai1 .. hai14)                                                                                                                                                                                                                                                     |
| h491 .. h497                      | 7 Items “Hamburg Modules for the Assessment of Psychosocial Health”; range: 0 .. 4                                                                                                                                                                                      |
| h49                               | Mean(h491 .. h497)                                                                                                                                                                                                                                                      |
| lsas11 .. lsas242                 | 48 Items „Liebowitz Social Anxiety Scale”; range: 0 .. 3                                                                                                                                                                                                                |
| lsas                              | Mean(lsas11 .. lsas242)                                                                                                                                                                                                                                                 |
| mddi1 .. mddi13                   | 13 Items „Muscle Dysmorphia Disorder Inventory”; range: 1 .. 5                                                                                                                                                                                                          |
| mddi                              | Mean(mddi1 .. mddi13)                                                                                                                                                                                                                                                   |
| sps1 .. sps8                      | 8 Items „Skin Picking Scale-Revised”; range: 0 .. 4                                                                                                                                                                                                                     |
| sps                               | Mean(sps1 .. sps8)                                                                                                                                                                                                                                                      |
| hps1 .. hps7                      | 7 Items “Massachusetts General Hospital Hairpulling Scale”; range: 0 .. 4                                                                                                                                                                                               |
| hps                               | Mean(hps1 .. hps7)                                                                                                                                                                                                                                                      |
| acq1 .. acq14                     | 14 Items “Questionnaire on Body-Related Fears, Cognitions and Avoidance: Agoraphobic Cognitions Questionnaire”; range: 1 .. 5                                                                                                                                           |
| acq                               | Mean(acq1 .. acq14)                                                                                                                                                                                                                                                     |

Sample size n=736; whenever required items were already inverted.
